# Supplementary material for: O-GlcNAcylation of SIRT1 Protects against Cold Stress-Induced Skeletal Muscle Damage via Amelioration of Mitochondrial Homeostasis
Source: MDPI journal article supplement (doi:10.3390/ijms232314520), 2022-11-22
Supplement: s1 [file s1]

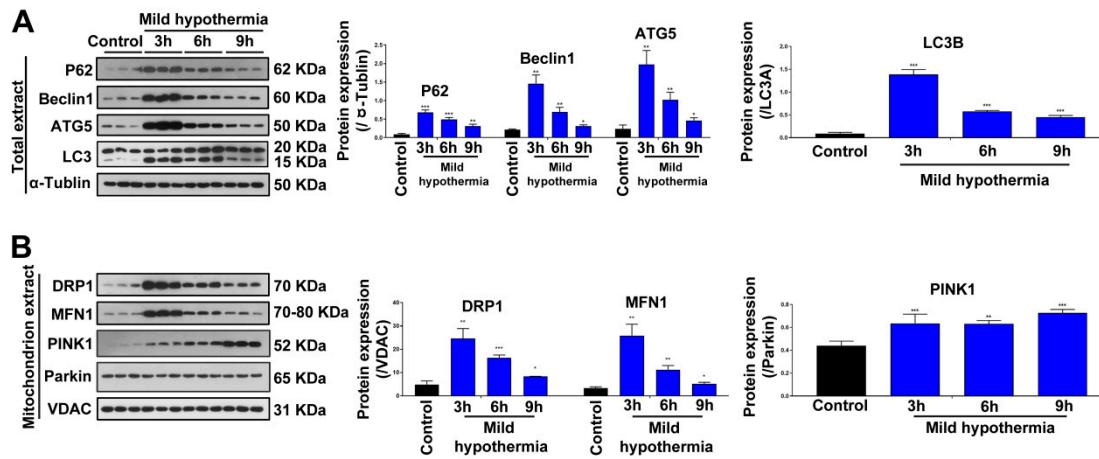

**Supplementary Figure S1. Statistics of autophagy and mitophagy-related proteins in C2C12 cells after exposure to MHT for different durations.** C2C12 cells were cultured at 32 °C for 3, 6, and 9 h, then collected to prepare total extract and mitochondrial extract. The expression levels of autophagy and mitophagy-related proteins in C2C12 cells were detected by western blot analysis. n = 3/group. Data is presented as the mean  $\pm$  SD (one-way ANOVA). \* $p$  < 0.05; \*\* $p$  < 0.01; \*\*\* $p$  < 0.001 vs. the control group.
